# Supplementary material for: Comparative analysis of the molecular subtype landscape in canine and human mammary gland tumors
Source: Springer Nature journal article supplement (doi:10.1007/s10911-022-09523-9), 2022-06-01

FIGURE S2

Subtype

- Basal
- HER2
- LumA
- LumB

Canine

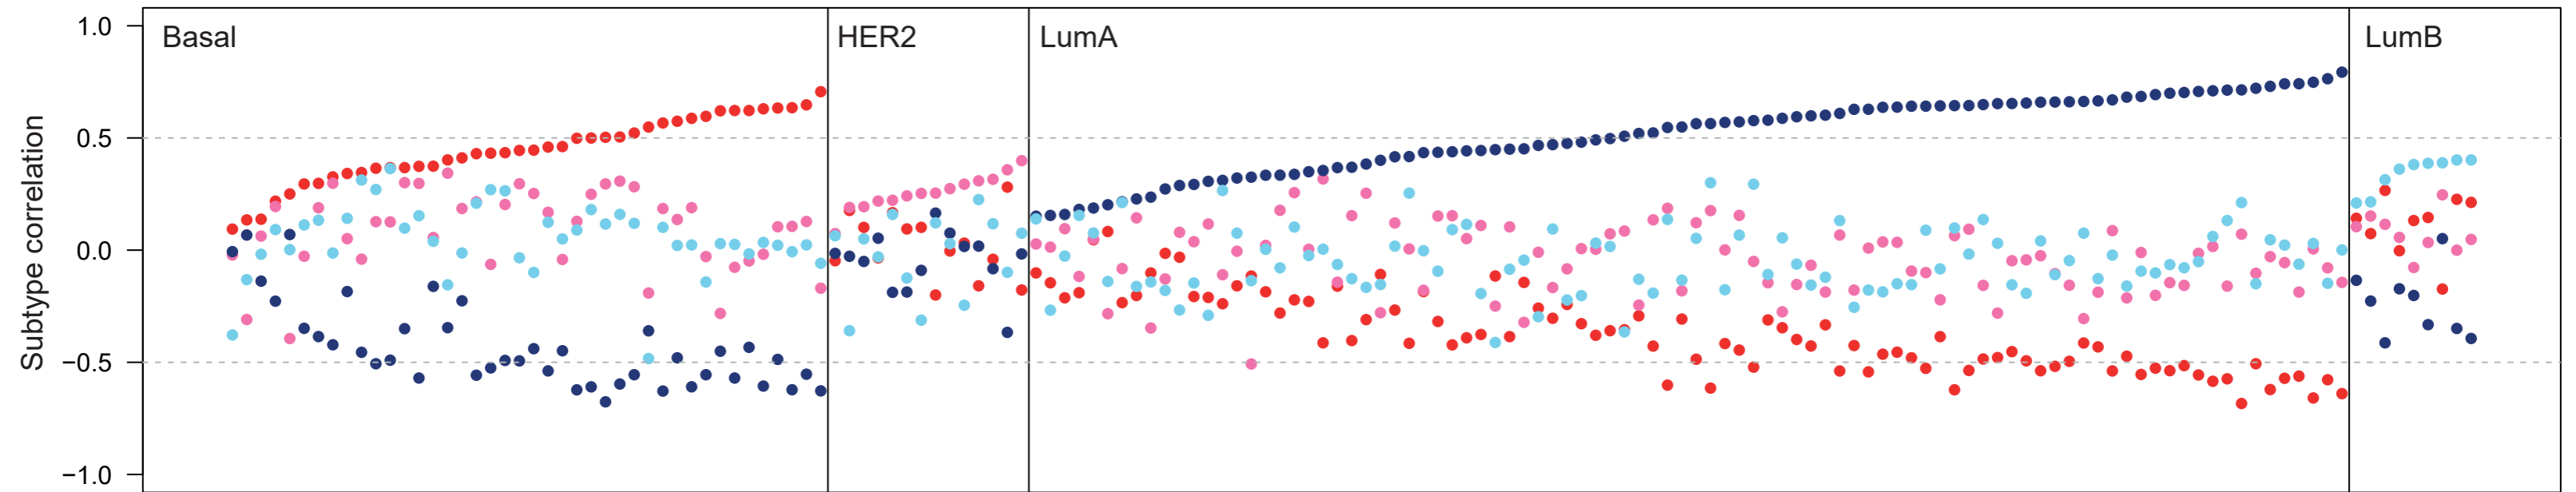

Human

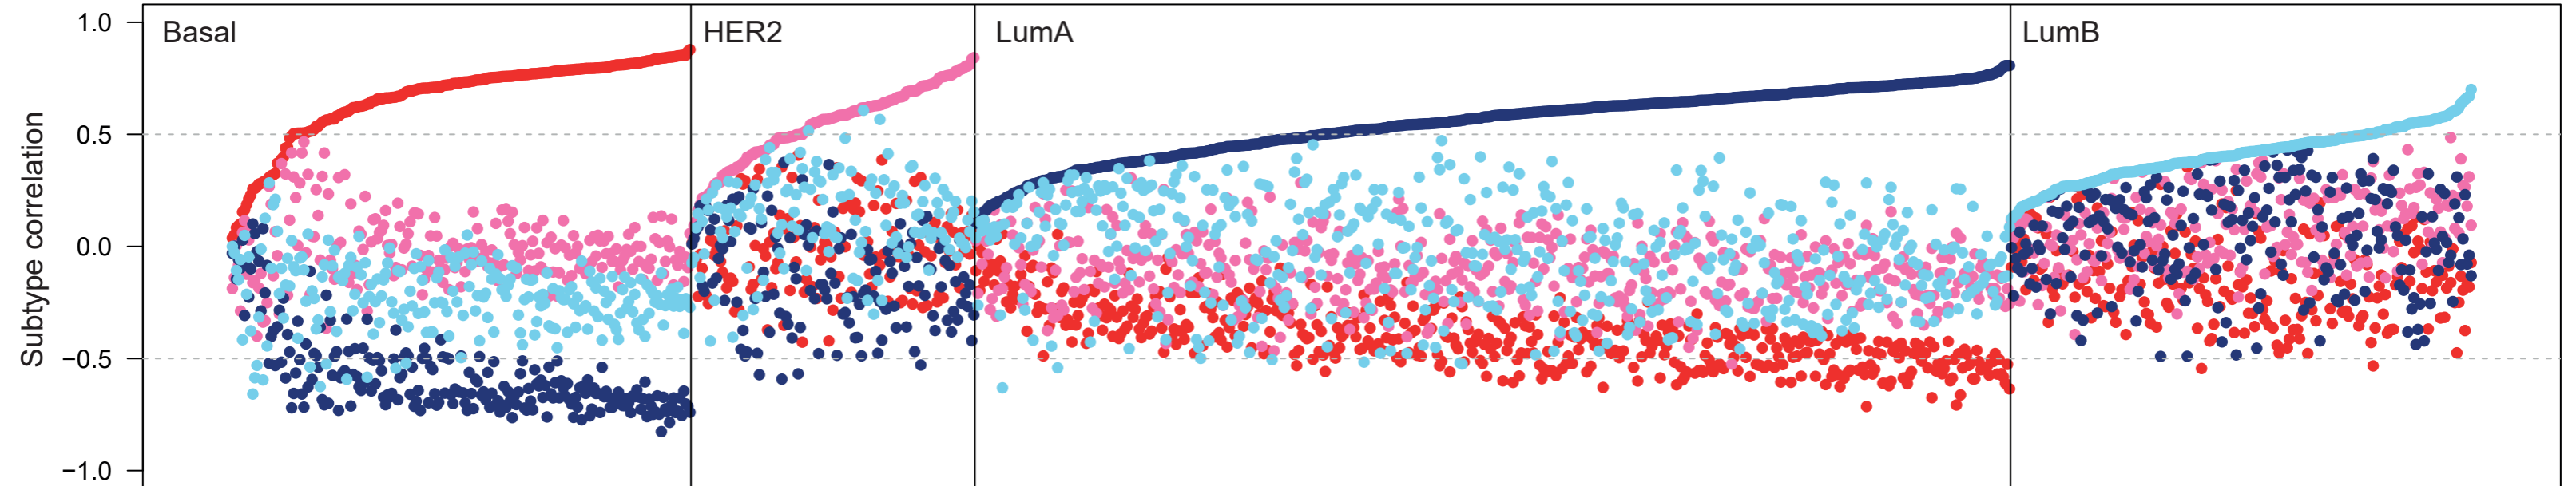

Supplement: MOESM2 [file 23342734]
