# Supplementary material for: Comparative analysis of the molecular subtype landscape in canine and human mammary gland tumors
Source: Springer Nature journal article supplement (doi:10.1007/s10911-022-09523-9), 2022-06-01

FIGURE S4

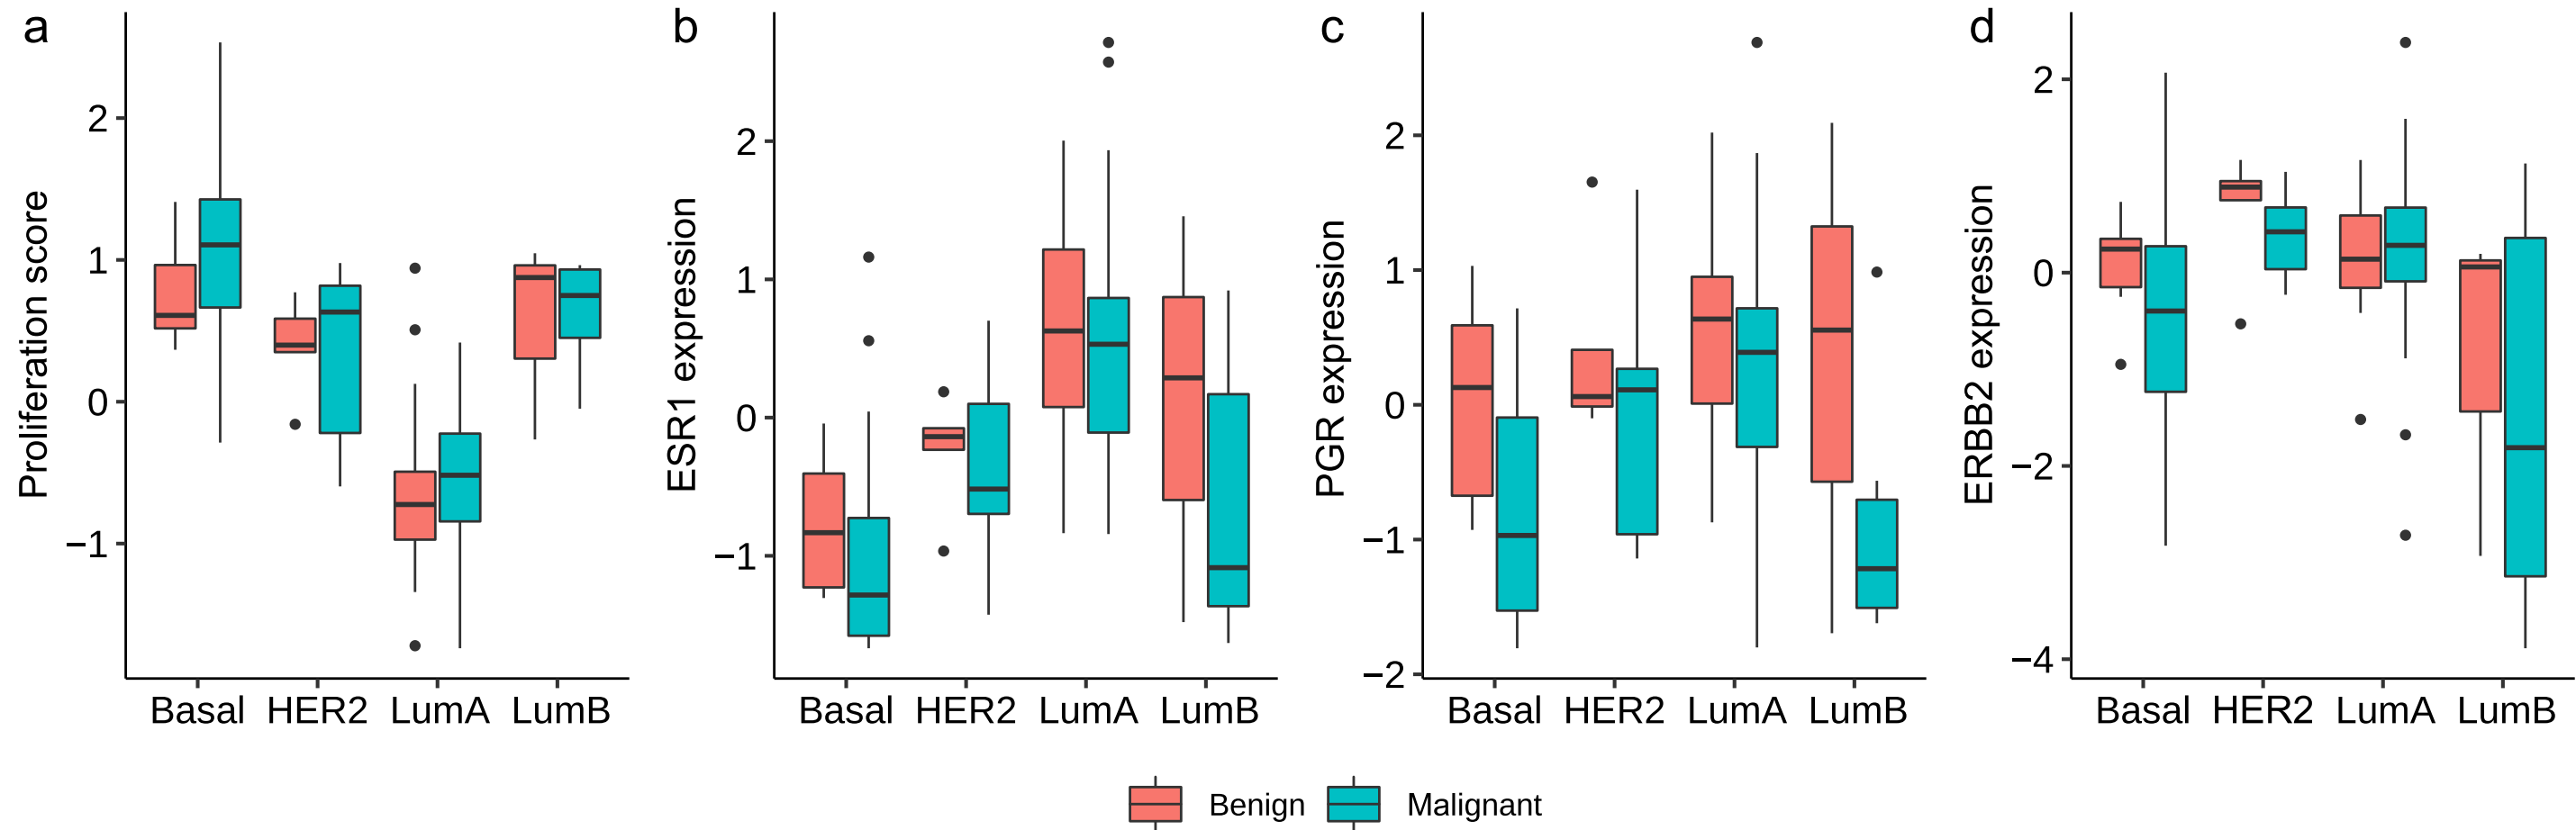

Supplement: MOESM4 [file 23342734]
